# Supplementary material for: Lytic bacteriophages induce the secretion of antiviral and proinflammatory cytokines from human respiratory epithelial cells
Source: PLoS Biol. 2024 Apr 23;22(4):e3002566. doi: 10.1371/journal.pbio.3002566 (PMC11037538; doi:10.1371/journal.pbio.3002566)
Supplement: S1 Data — (XLSX) [file pbio.3002566.s010.xlsx]

## Sheet: Figure 1A
OMKO1	LPS-5	PSA34	PSA04
51.2143	36.6533	35.3701	51.2143
48.3704	22.7593	20.1301	48.3704
54.9086	41.8956	24.4292	54.9086

## Sheet: Figure 1B
	OMKO1			LPS-5			PSA04			PSA34
-	7.36173	7.65321	7.43136	7.36173	7.65321	7.43136	7.62325	7.34242	7.49136	7.64345	7.5563	7.43136
+	5.11394	5.69897	5.4624	2.30103	2	2.47712	5.53148	5.41497	5.63347	4.34242	3.77815	4.25527

## Sheet: Figure 1D
OMKO1 capsid	OMKO1 tail	LPS-5 capsid	LPS-5 tail	PSA04 capsid	PSA04 tail	PSA34 capsid	PSA34 tail
107	183	57	78	70	148	55	21
111	180	65	108	58	125	58	15
136	175	58	95	62	127	60	18

## Sheet: Figure 2
Phage name	Phage accession number	Host	Morphology family	Head size	Tail
BrSP1	NC_048675.1	ATCC 27853	Myovirus	50	125
PaoP5	NC_029083.1	PAO1	Myovirus	60	110
PaP1	NC_019913.1	PA1 (CP004054.2)	Myovirus	80	130
DL52	KR054028.1	PAO1	Myovirus	60	120
DL54	NC_028919.1	PAO1	Podovirus	45	10
DL60	KR054030.1	PAO1	Myovirus	75	95
DL62	KR054031.1	PAO1	Podovirus	60	15
DL64	KR054032.1	PAO1	Podovirus	65	10
DL68	KR054033.1	PAO1	Myovirus	70	180
PA01	AP019535.1	PAO1	Myovirus	70	150
PA02	AP019418.1	PAO1	Myovirus	130	210
V523	MW595220.1	PAO1	Myovirus	80	140
V524	MW595221.1	PAO1	Myovirus	75	120
KTN6	KP340288.1	PAO1	Myovirus	75	135
KT28	KP340287.1	PAO1	Myovirus	70	125
SL1	MF768470	PA1 (CP004054.2)	Myovirus	70	130
SL2	MF805716	PA2 (1324448775)	Myovirus	120	170
SL4	MF768469	PA4 (1324457708)	Podovirus	55	20
MAG1	NC_031073.1	ATCC 15542	Myovirus	70	100
MAG4	NC_031104.1	ATCC 15542	Podovirus	60	35
KMV	NC_005045.1	PAO1	Podovirus	60	20
LUZ24	AM910650.1	PAO1	Podovirus	60	10
vB_PaeM_SCUT-S1	MK340760.1	PAO1	Myovirus	80	155
vB_PaeM_SCUT-S2	MK340761.1	PAO1	Myovirus	85	135
LKA1	NC_009936.1	PAO1	Podovirus	60	10
LKD16	NC_009935.1	PAO1	Podovirus	60	10
vB_PaeM_MIJ3	LR588166.1	PAO1	Myovirus	130	140
phipa2	OK539824.1	ZS-PA-35 (2154629404)	Podovirus	50	20
phipa4	OK539825.1	ZS-PA-16 (2154628898)	Siphovirus	50	175
phipa10	OK539826.1	ZS-PA-35 (2154629404)	Myovirus	60	110
TC6	MG676466.1	PA1 (CP004054.2)	Podovirus	55	20
EPA1	MN013356.1	PAO1	Myovirus	70	145
K8	KT736033.1	PAK	Myovirus	75	120
C11	KT804923.1	PAK	Myovirus	65	120
JG024	GU815091	PAO1, PA14	Myovirus	80	130
L5	OL754589.1	PAO1r (galU mutant) https://www.ncbi.nlm.nih.gov/pmc/articles/PMC5961081/, https://www.ncbi.nlm.nih.gov/pmc/articles/PMC9284122/	Podovirus	55	10
PhiKZ	NC_004629.1	PAO1	Myovirus	140	160
PA1O	NC_023700.1	PAO1, ATCC 29853	Siphovirus	60	165
YuA	AM749441.1	PAO1	Siphovirus	70	145
Motto	ON843697	PAO1	Siphovirus	60	255
vB_Pae_SMP5	https://www.bv-brc.org/view/Genome/2731619.92#view_tab=overview	PA2	Siphovirus	60	170
OMKO1		PAO1	Myovirus	120	180
LPS-5		PAO1	Myovirus	60	90
PSA34		DVT411	Podovirus	60	20
PSA39		DVT423	Siphovirus	65	135

## Sheet: Figure 3A
	OMKO1			LPS-5			PSA34			PSA04
7.5	2.97832e-05	1.4892e-05	7.4458e-05	0.000595663	0.00047359	0.0006243	0.00288034	0.00328674	0.00599312	0.00177094	0.0020954	0.00326841
6.5	0.00297832	0.00260603	0.00521205	0.0037229	0.00362169	0.0041274	0.00491648	0.00550364	0.00763192	0.00464079	0.00353193	0.00441365

## Sheet: Figure 3C
	OMKO1	OMKO1	OMKO1	LPS-5	LPS-5	LPS-5	PSA34	PSA34	PSA34	PSA04	PSA04	PSA04
7.5	56	295	243	83	214	384	28	104	454	65	20	69
6.5	204	451	330	175	672	564	176	154	568	26	115	61

## Sheet: Figure 3D
	OMKO1	OMKO1	OMKO1	LPS-5	LPS-5	LPS-5	PSA04	PSA04	PSA04	PSA34	PSA34	PSA34
0.05-0.5 μm3	57.1429	70.5085	70.8155	68.1921	95.5975	91.4894	56.6667	69.4737	57.377	89.2241	80.1075	76.6234
0.5-5 μm3	42.8571	28.4746	27.897	30.113	4.24528	7.0922	37.5714	21.0526	36.7049	7.11207	11.828	12.987
>5 μm3	0	1.01695	1.28755	1.69492	0.157233	1.41844	5.7619	9.47368	5.91803	3.66379	8.06452	10.3896

## Sheet: Figure 3E
	OMKO1	OMKO1	OMKO1	LPS-5	LPS-5	LPS-5	PSA04	PSA04	PSA04	PSA34	PSA34	PSA34
0.05-0.5 μm3	64.902	70.4261	80.9375	75.4717	95.3271	90.8854	95.3846	86.6667	69.5652	78.5714	91.3462	95.3581
0.5-5 μm3	33.6275	26.9108	17.8125	21.6981	4.6729	8.07292	4.61538	13.3333	30.4348	21.4286	8.65385	4.11141
>5 μm3	1.47059	2.66312	1.25	2.83019	0	1.04167	0	0	0	0	0	0.530504

## Sheet: Figure 4B
	OMKO1			LPS-5			PSA34			PSA04
0	400.62	288.42	443.85	378.84	275.22	425.7	454.08	313.83	410.52	482.79	309.54	403.92
24	488.4	282.48	379.17	445.17	260.7	414.81	462.99	299.64	396.33	505.56	266.31	454.74
48	309.21	297.33	483.78	402.6	282.15	374.88	436.92	305.25	375.87	520.74	304.92	380.16

## Sheet: Figure 4C
OMKO1	LPS-5	PSA04	PSA34	Stauro
4.273	7.87616	7.9725	5.74413	29.7189
4.69129	0.221411	7.34362	6.43869	22.4662
0.815905	2.57149	4.01735	3.92645	15.4433

[truncated: 19 more sheets: Figure 5B, Figure 5D, Figure 6A, Figure 6B, Figure 6C, Figure 6D, Figure 7A - OMKO1, Figure 7A - LPS-5, Figure 7A - PSA04, Figure 7A - PSA34, Figure 7B, Figure 7C, Figure 8A, Figure 8B, Figure 8C, Figure S2, Figure S3, Figure S6, Figure S7]
